# Supplementary material for: Theoretical study of magnetostructural correlations in a family of triangular manganese(iii) complexes
Source: Royal Society of Chemistry journal article supplement (doi:10.1039/b906689f), 2009-01-01
Supplement: b906689f.pdf [file b906689f.pdf]

The dependence of  $J$  on  $\Delta_{ij}$  for complex **1** through distorting  $\tau$  using the second or third way, respectively, which are shown in Figure 16.

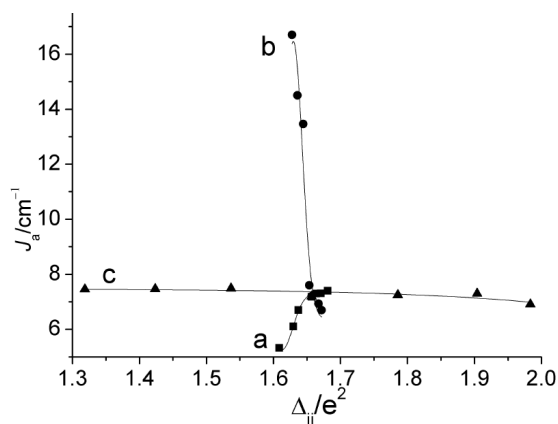

**Figure 16.** Dependence of the exchange coupling constants  $J_a$  on the  $\Delta_{ij}$  for **1**: <sup>a</sup> distorting three  $\tau$  using the second way (■); <sup>b</sup> distorting one  $\tau$  using the second way (●); <sup>c</sup> distorting three  $\tau$  using the third way (▲).

When we change three  $\tau$  of complex **1** using the second way, the variations in the calculated  $\Delta_{ij}$  are small resulting in the small variations in  $J_a$ . However, the variations in the calculated  $\Delta_{ij}$  corresponding to  $J_a$  are also small when we change one  $\tau$  using the second way for **1**, but the variations in  $J_a$  are large (see Figure 11). The above results show that distorting one  $\tau$  using the second way for **1** have a small influence on the overlap integrals  $S_{ij}$ , and which have no way to rationalize the variations in  $J$ . As our previous papers indicated,<sup>25(a-b)</sup>  $S_{ij}$  can not always be used to rationalize the variations in  $J$  especially when the magnetic interactions are ferromagnetic. When we decrease three  $\tau$  using the third way, the calculated  $\Delta_{ij}$  corresponding to  $J_a$  increase largely (see Figure 16) which should decrease  $J_a$ . However, Figure 12 shows that the variations in  $J_a$  for **1** are very small. The above result also shows that distorting  $\tau$  using the third way has a large influence on  $S_{ij}$ , but a small on  $J_a$  because the variations in  $S_{ij}$  are no longer the dominant factor to influence  $J_a$  at this time.
